# Supplementary material for: Improved the Methanol Electro-Oxidation and Carbon Monoxide Tolerance for Direct Methanol Fuel Cells Using Strontium Molybdate
Source: MDPI journal article supplement (doi:10.3390/catal12070676), 2022-06-21
Supplement: s1 [file s1]

## Supplementary material

# Improved the Methanol Electro-Oxidation and Carbon Monoxide Tolerance for Direct Methanol Fuel Cells Using Strontium Molybdate

Tzu Hsuan Chiang \* and Jia-Wei Hsu

Department of Energy Engineering, National United University, Miaoli 36006, Taiwan;  
adamant0989858384@gmail.com

\* Correspondence: thchiang@nuu.edu.tw; Tel.: +886-37382385; Fax: +886-37382402

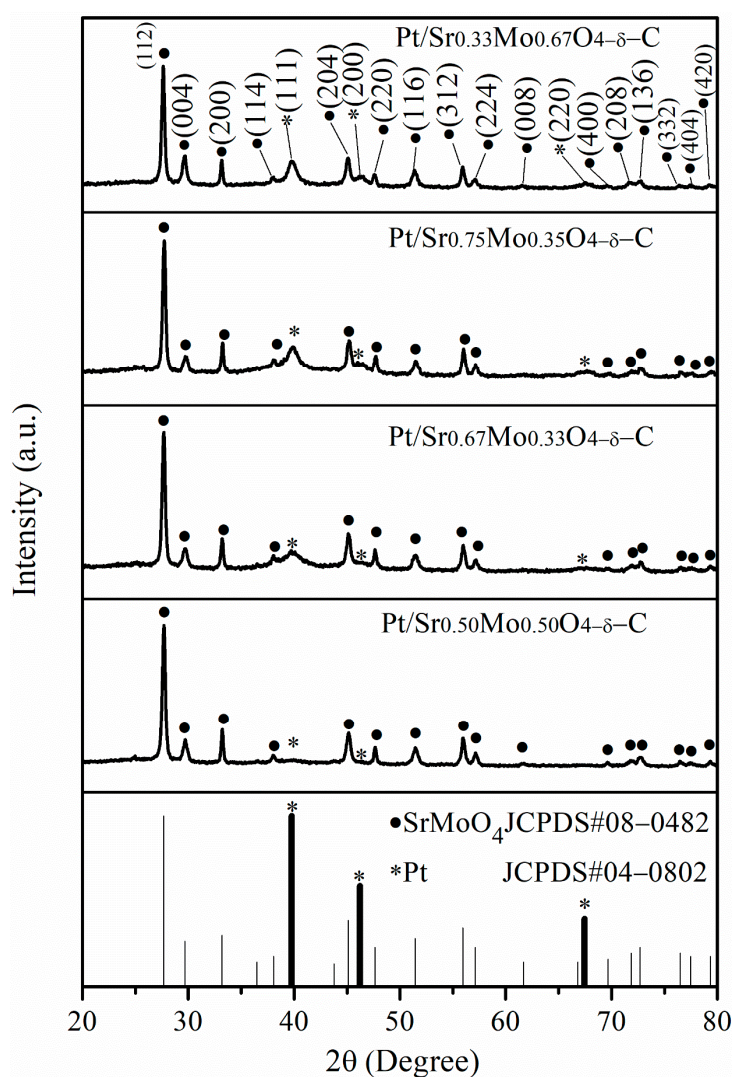

**Figure S1.** XRD of various electrocatalysts, the \* symbol means Pt structure, and • symbol means SrMoO<sub>4</sub> form.

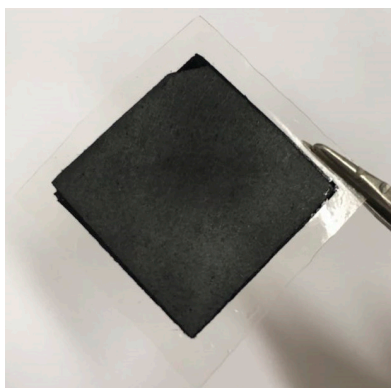

(a)

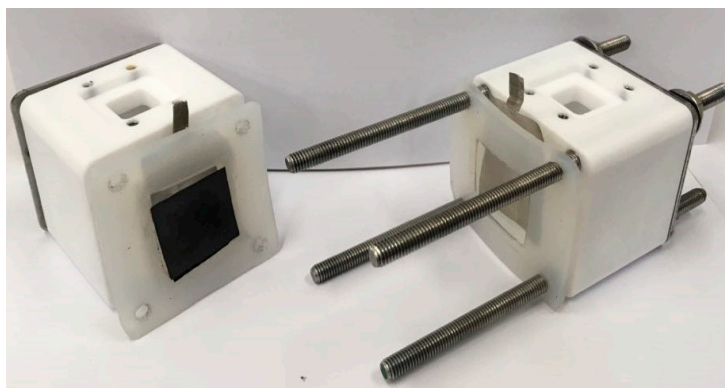

(b)

**Figure S2.** (a) MEA and (b) simple single DMFC assembly.

**Table S1.** The peak fitting for various electrocatalysts in the Mo 3d region

| Electrocatalysts                                                                  | Peak                       | Position (eV) | FWHM (eV) | Doublet separation (eV) |
|-----------------------------------------------------------------------------------|----------------------------|---------------|-----------|-------------------------|
| 20%-Pt/uncalcined<br>$\text{Sr}_{0.5}\text{Mo}_{0.5}\text{O}_{4-\delta}\text{-C}$ | $\text{Mo}^{5+}(3d_{5/2})$ | 232.76        | 1.2       | 3.13                    |
|                                                                                   | $\text{Mo}^{5+}(3d_{3/2})$ | 235.89        | 1.2       |                         |
|                                                                                   | $\text{Mo}^{6+}(3d_{5/2})$ | 234.19        | 1.9       | 3.13                    |
|                                                                                   | $\text{Mo}^{6+}(3d_{3/2})$ | 237.32        | 1.9       |                         |
| 20%-Pt/ 200°C<br>$\text{Sr}_{0.5}\text{Mo}_{0.5}\text{O}_{4-\delta}\text{-C}$     | $\text{Mo}^{5+}(3d_{5/2})$ | 232.90        | 1.6       | 3.13                    |
|                                                                                   | $\text{Mo}^{5+}(3d_{3/2})$ | 236.10        | 1.6       |                         |
|                                                                                   | $\text{Mo}^{6+}(3d_{5/2})$ | 234.10        | 1.4       | 3.13                    |
|                                                                                   | $\text{Mo}^{6+}(3d_{3/2})$ | 237.15        | 1.4       |                         |
| 20%-Pt/ 400°C<br>$\text{Sr}_{0.5}\text{Mo}_{0.5}\text{O}_{4-\delta}\text{-C}$     | $\text{Mo}^{5+}(3d_{5/2})$ | 233.75        | 2.3       | 3.13                    |
|                                                                                   | $\text{Mo}^{5+}(3d_{3/2})$ | 236.88        | 2.3       |                         |
|                                                                                   | $\text{Mo}^{6+}(3d_{5/2})$ | 234.77        | 2.4       | 3.13                    |
|                                                                                   | $\text{Mo}^{6+}(3d_{3/2})$ | 238.00        | 2.4       |                         |
| 20%-Pt/ $\text{Sr}_{0.33}\text{Mo}_{0.67}\text{O}_{4-\delta}\text{-C}$            | $\text{Mo}^{5+}(3d_{5/2})$ | 232.80        | 1.3       | 3.13                    |
|                                                                                   | $\text{Mo}^{5+}(3d_{3/2})$ | 235.93        | 1.3       |                         |
|                                                                                   | $\text{Mo}^{6+}(3d_{5/2})$ | 24.10         | 1.4       | 3.13                    |
|                                                                                   | $\text{Mo}^{6+}(3d_{3/2})$ | 237.2         | 1.4       |                         |
| 20%-Pt/ $\text{Sr}_{0.67}\text{Mo}_{0.33}\text{O}_{4-\delta}\text{-C}$            | $\text{Mo}^{5+}(3d_{5/2})$ | 232.86        | 1.4       | 3.13                    |
|                                                                                   | $\text{Mo}^{5+}(3d_{3/2})$ | 236.04        | 1.0       |                         |
|                                                                                   | $\text{Mo}^{6+}(3d_{5/2})$ | 234.00        | 1.2       | 3.13                    |
|                                                                                   | $\text{Mo}^{6+}(3d_{3/2})$ | 237.13        | 1.2       |                         |
| 20%- $\text{Sr}_{0.75}\text{Mo}_{0.25}\text{O}_{4-\delta}\text{-C}$               | $\text{Mo}^{5+}(3d_{5/2})$ | 233.20        | 1.3       | 3.13                    |
|                                                                                   | $\text{Mo}^{5+}(3d_{3/2})$ | 236.33        | 1.3       |                         |

|  |                                       |        |     |      |
|--|---------------------------------------|--------|-----|------|
|  | Mo <sup>6+</sup> (3d <sub>5/2</sub> ) | 234.30 | 2.4 | 3.13 |
|  | Mo <sup>6+</sup> (3d <sub>3/2</sub> ) | 237.23 | 2.4 |      |

**Table S2.** The peak fitting for various electrocatalysts in the Sr 3d region

| Electrocatalysts                                                             | Peak                                   | Position (eV) | FWHM (eV) | Doublet separation (eV) |
|------------------------------------------------------------------------------|----------------------------------------|---------------|-----------|-------------------------|
| 20%-Pt/uncalcined<br>Sr <sub>0.5</sub> Mo <sub>0.5</sub> O <sub>4-δ</sub> -C | SrO(3d <sub>5/2</sub> )                | 132.90        | 1.9       | 1.79                    |
|                                                                              | SrO (3d <sub>3/2</sub> )               | 134.69        | 1.9       |                         |
| 20%-Pt/ 200°C<br>Sr <sub>0.5</sub> Mo <sub>0.5</sub> O <sub>4-δ</sub> -C     | SrO(3d <sub>5/2</sub> )                | 132.95        | 1.8       | 1.79                    |
|                                                                              | SrO (3d <sub>3/2</sub> )               | 134.74        | 1.8       |                         |
| 20%-Pt/ 400°C<br>Sr <sub>0.5</sub> Mo <sub>0.5</sub> O <sub>4-δ</sub> -C     | SrO(3d <sub>5/2</sub> )                | 132.90        | 1.6       | 1.79                    |
|                                                                              | SrO (3d <sub>3/2</sub> )               | 134.69        | 1.6       |                         |
|                                                                              | SrCO <sub>3</sub> (3d <sub>5/2</sub> ) | 133.90        | 1.1       | 1.79                    |
|                                                                              | SrCO <sub>3</sub> (3d <sub>3/2</sub> ) | 135.69        | 1.1       |                         |
| 20%-Pt/Sr <sub>0.33</sub> Mo <sub>0.67</sub> O <sub>4-δ</sub> -C             | SrO(3d <sub>5/2</sub> )                | 132.80        | 1.0       | 1.79                    |
|                                                                              | SrO (3d <sub>3/2</sub> )               | 134.59        | 1.3       |                         |
| 20%-Pt/Sr <sub>0.67</sub> Mo <sub>0.33</sub> O <sub>4-δ</sub> -C             | SrO(3d <sub>5/2</sub> )                | 132.85        | 1.3       | 1.79                    |
|                                                                              | SrO (3d <sub>3/2</sub> )               | 135.44        | 1.3       |                         |
|                                                                              | SrCO <sub>3</sub> (3d <sub>5/2</sub> ) | 133.80        | 1.7       | 1.79                    |
|                                                                              | SrCO <sub>3</sub> (3d <sub>3/2</sub> ) | 135.59        | 1.7       |                         |
| 20%-Sr <sub>0.75</sub> Mo <sub>0.25</sub> O <sub>4-δ</sub> -C                | SrO(3d <sub>5/2</sub> )                | 133.00        | 1.6       | 1.79                    |
|                                                                              | SrO (3d <sub>3/2</sub> )               | 134.79        | 1.7       |                         |

**Table S3.** The peak fitting for various electrocatalysts in the Pt 4f region

| Electrocatalysts                                                             | Peak                                  | Position (eV) | FWHM (eV) | Doublet separation (eV) |
|------------------------------------------------------------------------------|---------------------------------------|---------------|-----------|-------------------------|
| Pt/C                                                                         | Pt <sup>0</sup> (4f <sub>7/2</sub> )  | 71.25         | 1.3       | 3.33                    |
|                                                                              | Pt <sup>0</sup> (4f <sub>5/2</sub> )  | 74.58         | 1.3       |                         |
|                                                                              | Pt <sup>2+</sup> (4f <sub>7/2</sub> ) | 72.34         | 2.0       | 3.33                    |
|                                                                              | Pt <sup>2+</sup> (4f <sub>5/2</sub> ) | 75.67         | 2.0       |                         |
|                                                                              | Pt <sup>4+</sup> (4f <sub>7/2</sub> ) | 74.24         | 1.3       | 3.33                    |
|                                                                              | Pt <sup>4+</sup> (4f <sub>5/2</sub> ) | 77.57         | 1.3       |                         |
| 20%-Pt/uncalcined<br>Sr <sub>0.5</sub> Mo <sub>0.5</sub> O <sub>4-δ</sub> -C | Pt <sup>0</sup> (4f <sub>7/2</sub> )  | 71.17         | 1.1       | 3.33                    |
|                                                                              | Pt <sup>0</sup> (4f <sub>5/2</sub> )  | 74.50         | 1.1       |                         |
|                                                                              | Pt <sup>2+</sup> (4f <sub>7/2</sub> ) | 72.22         | 1.5       | 3.33                    |
|                                                                              | Pt <sup>2+</sup> (4f <sub>5/2</sub> ) | 75.55         | 1.5       |                         |
|                                                                              | Pt <sup>4+</sup> (4f <sub>7/2</sub> ) | 73.87         | 1.3       | 3.33                    |
|                                                                              | Pt <sup>4+</sup> (4f <sub>5/2</sub> ) | 77.20         | 1.3       |                         |
| 20%-Pt/ 200°C                                                                | Pt <sup>0</sup> (4f <sub>7/2</sub> )  | 71.47         | 1.0       | 3.33                    |

|                                                                               |                            |       |     |      |
|-------------------------------------------------------------------------------|----------------------------|-------|-----|------|
| $\text{Sr}_{0.5}\text{Mo}_{0.5}\text{O}_{4-\delta}\text{-C}$                  | $\text{Pt}^0(4f_{5/2})$    | 74.76 | 1.0 |      |
|                                                                               | $\text{Pt}^{2+}(4f_{7/2})$ | 72.25 | 2.3 | 3.33 |
|                                                                               | $\text{Pt}^{2+}(4f_{5/2})$ | 75.58 | 2.3 |      |
|                                                                               | $\text{Pt}^{4+}(4f_{7/2})$ | 74.01 | 2.2 | 3.33 |
|                                                                               | $\text{Pt}^{4+}(4f_{5/2})$ | 77.34 | 2.2 |      |
| 20%-Pt/ 400°C<br>$\text{Sr}_{0.5}\text{Mo}_{0.5}\text{O}_{4-\delta}\text{-C}$ | $\text{Pt}^0(4f_{7/2})$    | 71.40 | 1.1 | 3.33 |
|                                                                               | $\text{Pt}^0(4f_{5/2})$    | 74.73 | 1.1 |      |
|                                                                               | $\text{Pt}^{2+}(4f_{7/2})$ | 72.31 | 1.9 | 3.33 |
|                                                                               | $\text{Pt}^{2+}(4f_{5/2})$ | 75.64 | 1.9 |      |
|                                                                               | $\text{Pt}^{4+}(4f_{7/2})$ | 74.28 | 2.7 | 3.33 |
|                                                                               | $\text{Pt}^{4+}(4f_{5/2})$ | 77.61 | 2.7 |      |
| 20%-Pt/ $\text{Sr}_{0.33}\text{Mo}_{0.67}\text{O}_{4-\delta}\text{-C}$        | $\text{Pt}^0(4f_{7/2})$    | 71.30 | 1.0 | 3.33 |
|                                                                               | $\text{Pt}^0(4f_{5/2})$    | 74.53 | 1.0 |      |
|                                                                               | $\text{Pt}^{2+}(4f_{7/2})$ | 72.00 | 1.7 | 3.33 |
|                                                                               | $\text{Pt}^{2+}(4f_{5/2})$ | 75.33 | 1.7 |      |
|                                                                               | $\text{Pt}^{4+}(4f_{7/2})$ | 73.97 | 2.4 | 3.33 |
|                                                                               | $\text{Pt}^{4+}(4f_{5/2})$ | 77.30 | 2.4 |      |
| 20%-Pt/ $\text{Sr}_{0.67}\text{Mo}_{0.33}\text{O}_{4-\delta}\text{-C}$        | $\text{Pt}^0(4f_{7/2})$    | 71.20 | 1.0 | 3.33 |
|                                                                               | $\text{Pt}^0(4f_{5/2})$    | 74.13 | 1.0 |      |
|                                                                               | $\text{Pt}^{2+}(4f_{7/2})$ | 72.10 | 1.7 | 3.33 |
|                                                                               | $\text{Pt}^{2+}(4f_{5/2})$ | 75.43 | 1.7 |      |
|                                                                               | $\text{Pt}^{4+}(4f_{7/2})$ | 73.94 | 2.0 | 3.33 |
|                                                                               | $\text{Pt}^{4+}(4f_{5/2})$ | 77.27 | 2.0 |      |
| 20%- $\text{Sr}_{0.75}\text{Mo}_{0.25}\text{O}_{4-\delta}\text{-C}$           | $\text{Pt}^0(4f_{7/2})$    | 71.19 | 1.1 | 3.33 |
|                                                                               | $\text{Pt}^0(4f_{5/2})$    | 74.52 | 1.1 |      |
|                                                                               | $\text{Pt}^{2+}(4f_{7/2})$ | 72.10 | 1.7 | 3.33 |
|                                                                               | $\text{Pt}^{2+}(4f_{5/2})$ | 75.43 | 1.7 |      |
|                                                                               | $\text{Pt}^{4+}(4f_{7/2})$ | 73.97 | 1.4 | 3.33 |
|                                                                               | $\text{Pt}^{4+}(4f_{5/2})$ | 77.30 | 1.4 |      |
